# Supplementary material
Source: Royal Society of Chemistry journal article supplement (doi:10.1039/d6cp00513f)
Supplement: d6cp00513f1.pdf [file d6cp00513f1.pdf]

**Supporting Information**

For

**Electrocatalysis of NO to NH<sub>3</sub> on Transition-metal Doped Two-dimensional  
BC<sub>2</sub>N: A DFT Study**

Submitted to *Physical Chemistry Chemical Physics*

by

Zehua Long<sup>a,b</sup>, Chenrong Wang<sup>a</sup>, Wei Zhang<sup>a</sup>, Shansong Sheng<sup>a</sup>, Jiajia Wang<sup>b,\*</sup>, Donghui Yang<sup>b,c,\*</sup>

a. CHN Energy Tongling Power Generation Co., Ltd., Tongling 244100, China

b. College of Materials Science and Engineering, Hohai University, Changzhou 213200, China

c. Suqian Research Institute of Hohai University, Suqian 223814, China

\* Corresponding authors: xcrysdn@163.com (J. Wang), donghuiyang@hhu.edu.cn (D. Yang)

**Table S1** compares the binding energies of single metal atoms on BC<sub>2</sub>N substrates with either B or N vacancies. It is evident that metal atoms exhibit lower binding energies at B vacancy sites, and all values are negative, indicating higher thermodynamics stability and the spontaneous nature of the doping process. The detailed binding energy values are as follows.

**Table S1.** E<sub>b</sub> of single transition-metal atoms doped at single B and N vacancy sites on two-dimensional BC<sub>2</sub>N substrates.

| B <sub>V</sub> @BC <sub>2</sub> N | E <sub>b</sub> (eV) | N <sub>V</sub> @BC <sub>2</sub> N | E <sub>b</sub> (eV) |
|-----------------------------------|---------------------|-----------------------------------|---------------------|
| Ti                                | -3.87               | Ti                                | 1.81                |
| V                                 | -2.50               | V                                 | 2.57                |
| Cr                                | -1.99               | Cr                                | 2.67                |
| Mn                                | -2.26               | Mn                                | 1.90                |
| Fe                                | -3.05               | Fe                                | 0.46                |
| Co                                | -2.90               | Co                                | -0.31               |
| Ni                                | -1.89               | Ni                                | 0.02                |
| Zr                                | -3.59               | Zr                                | 2.00                |
| Nb                                | -1.69               | Nb                                | 2.81                |
| Mo                                | -0.77               | Mo                                | 3.23                |
| Ru                                | -1.54               | Ru                                | 1.05                |
| Rh                                | -2.03               | Rh                                | -0.61               |
| Pd                                | -0.87               | Pd                                | -0.08               |

**Table S2** presents the free energy comparison between the initial NO adsorption step of the NORR-to-NH<sub>3</sub> pathway and the competing HER process on TM@BC<sub>2</sub>N. The results indicate that upon TM doping, the free energies of HER are significantly higher than those of NO adsorption, suggesting that hydrogen evolution is suppressed and NO adsorption is energetically favored.

**Table S2.** Gibbs free energies of three different NO adsorption configurations and the HER on TM@BC<sub>2</sub>N substrates. F denotes that the corresponding adsorption configuration is not stable.

| TM@BC <sub>2</sub> N | N-end(eV) | NO-side(eV) | O-end(eV) | HER(eV) |
|----------------------|-----------|-------------|-----------|---------|
| Ti                   | -2.10     | -2.13       | -1.29     | -0.83   |
| V                    | -2.96     | -2.99       | -1.72     | -0.83   |
| Cr                   | -3.39     | -3.23       | -1.60     | -0.73   |
| Mn                   | -2.93     | -2.12       | -1.42     | -0.59   |
| Fe                   | -2.45     | F           | -1.13     | -0.36   |
| Co                   | -1.71     | F           | -0.39     | 0.36    |
| Ni                   | -2.05     | F           | -0.66     | 0.05    |
| Zr                   | -1.96     | -2.07       | -1.16     | -1.16   |
| Nb                   | -2.996    | -3.33       | -1.73     | -1.73   |
| Mo                   | -3.51     | -3.87       | -2.10     | -2.10   |
| Ru                   | -2.58     | F           | -1.23     | -0.51   |
| Rh                   | -1.48     | F           | -0.20     | 0.25    |
| Pd                   | -1.81     | F           | -0.53     | -0.25   |

In the hydrogenation pathway analysis, distinct variations in the RDS were observed among different TM@BC<sub>2</sub>N systems. For Ti@BC<sub>2</sub>N, V@BC<sub>2</sub>N, Cr@BC<sub>2</sub>N, Zr@BC<sub>2</sub>N, Nb@BC<sub>2</sub>N, Mo@BC<sub>2</sub>N, and Pd@BC<sub>2</sub>N, the NH<sub>2</sub>→NH<sub>3</sub> conversion constitutes the primary RDS, whereas for Mn@BC<sub>2</sub>N, Fe@BC<sub>2</sub>N, Ni@BC<sub>2</sub>N, and Ru@BC<sub>2</sub>N, the RDS occurs at the NO → NHO step. These findings indicate that both the initial and terminal hydrogenation stages play particularly critical roles in determining the overall kinetics of NORR (see **Figure S1**).

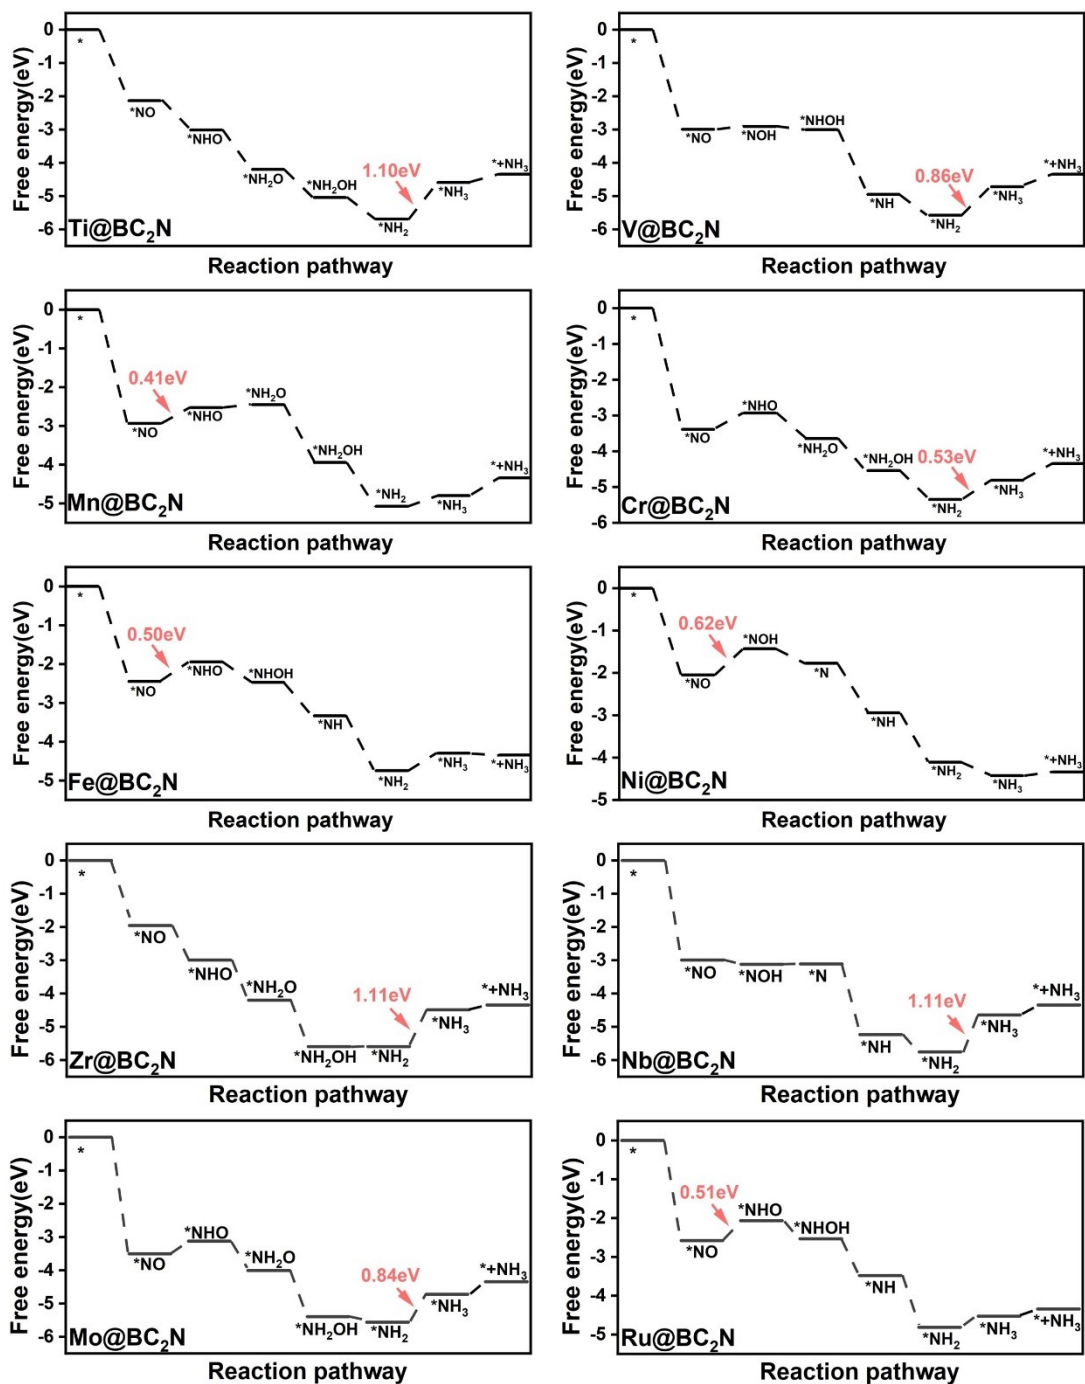

**Figure S1.** Gibbs free energy diagrams for NORR-to-NH<sub>3</sub> pathways on the remaining TM@BC<sub>2</sub>N substrates.

The full Gibbs free-energy diagrams (see Figure S2) enable a more comprehensive comparison among the possible hydrogenation sequences and further substantiate the identification of the most favorable pathway for each catalyst.

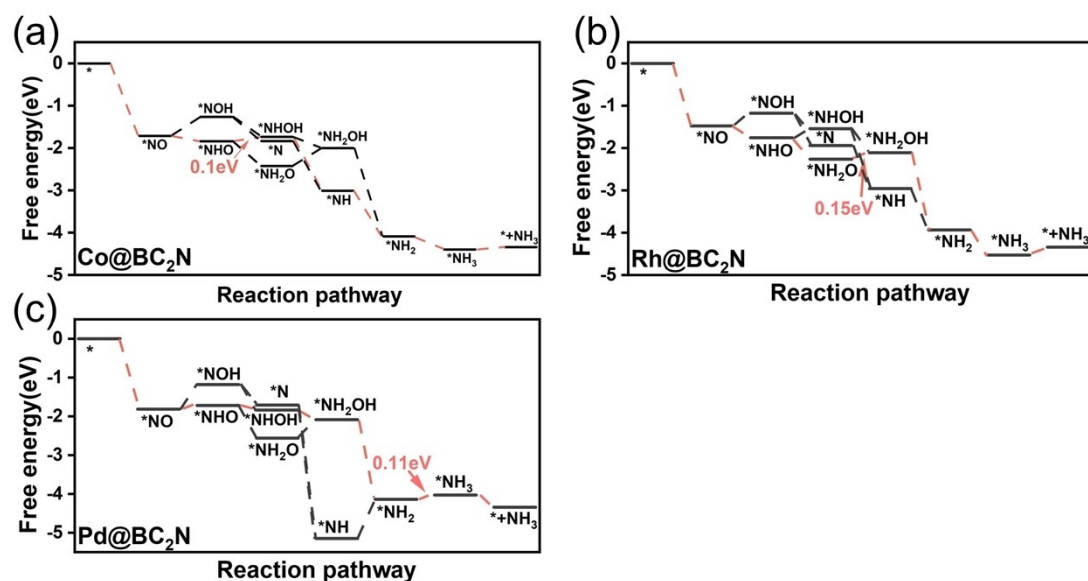

**Figure S2.** Optimal NORR pathways on Co@BC<sub>2</sub>N, Rh@BC<sub>2</sub>N, and Pd@BC<sub>2</sub>N(a-c). Complete free-energy diagrams including all intermediates.

The results of **Table S3** show that the NH<sub>3</sub> desorption energies remain moderate for the highly active candidates, including Co@BC<sub>2</sub>N, Rh@BC<sub>2</sub>N, and Pd@BC<sub>2</sub>N, and stay within a feasible range (< 0.2 eV). Moreover, as reported previously, NH<sub>3</sub> can be further protonated to NH<sub>4</sub><sup>+</sup> under acidic conditions, which facilitates product release from the catalyst surface (ACS Catalysis, 2017, 7, 6, 3869-3882). Therefore, although NH<sub>3</sub> desorption requires an additional energetic step, it does not alter the overall conclusion that Co@BC<sub>2</sub>N remains the most promising candidate for NORR.

**Table S3.** Calculated NH<sub>3</sub> desorption free energies on TM@BC<sub>2</sub>N.

| TM@BC <sub>2</sub> N | Desorption Free Energy (eV) | TM@BC <sub>2</sub> N | Desorption Free Energy (eV) |
|----------------------|-----------------------------|----------------------|-----------------------------|
| Ti                   | 0.25                        | Zr                   | 0.14                        |
| V                    | 0.38                        | Nb                   | 0.30                        |
| Cr                   | 0.47                        | Mo                   | 0.38                        |
| Mn                   | 0.46                        | Ru                   | 0.19                        |
| Fe                   | -0.04                       | Rh                   | 0.18                        |
| Co                   | 0.06                        | Pd                   | -0.31                       |
| Ni                   | 0.09                        |                      |                             |

We carried out comparative NORR calculations using the PBEsol functional (see Figure S3.a, c, e) Although minor quantitative differences are observed, the key proton-coupled electron transfer (PCET) steps and the corresponding RDS are consistent with those obtained using the PBE functional, with deviations also within 0.1 eV. These cross-checks demonstrate that the main conclusions of this work are reliable and insensitive to the choice of solvation treatment or exchange-correlation functional.

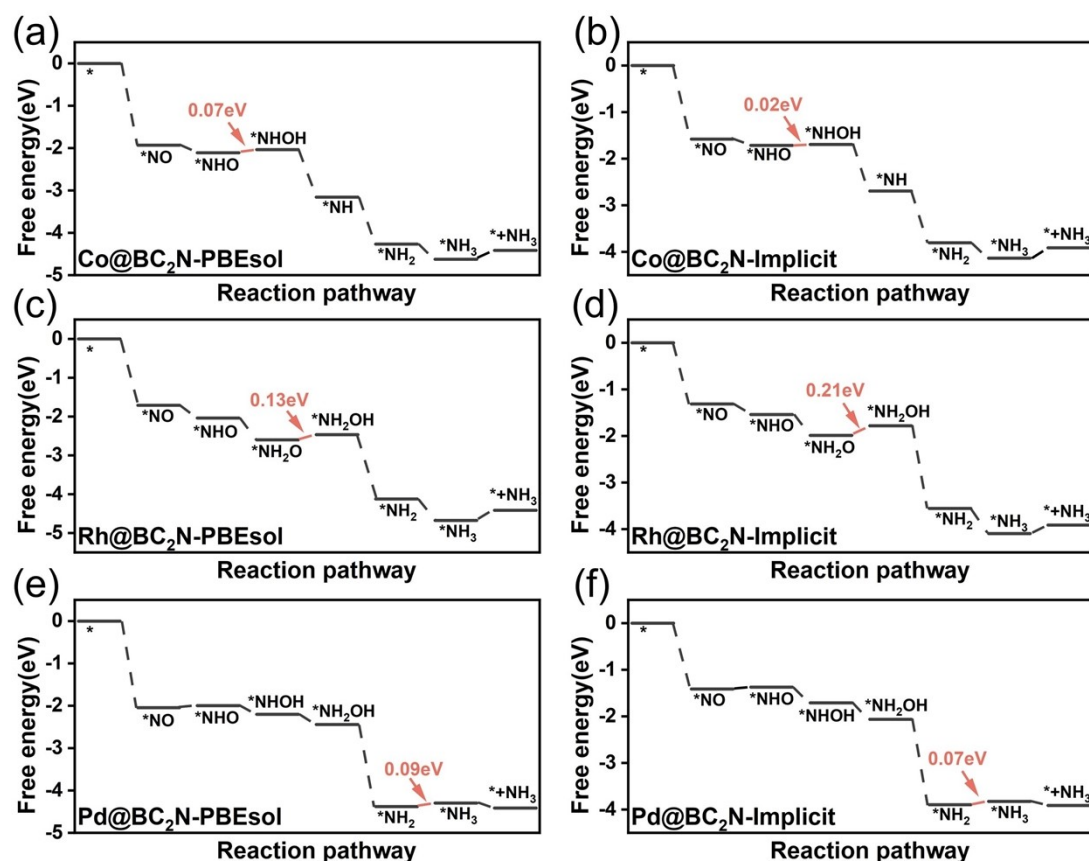

**Figure S3.** NORR Gibbs free-energy profiles on Co@BC<sub>2</sub>N, Rh@BC<sub>2</sub>N, and Pd@BC<sub>2</sub>N calculated with PBEsol functionals and implicit solvation conditions. (a,c,e) PBEsol results; (b,d,f) VASPsol results.

To address the concern regarding the vacuum slab approximation, we performed additional calculations using an implicit solvation model (VASPsol) for representative systems, namely Co@BC<sub>2</sub>N, Rh@BC<sub>2</sub>N, and Pd@BC<sub>2</sub>N (see Figure S3 b, d, f). The results indicate that the solvation treatment stabilizes the adsorbed intermediates and slightly lowers the rate-determining step (RDS) barriers, while the overall reaction trends and catalyst ranking remain unchanged. Notably, the differences in the key free-energy values are within 0.1 eV, confirming the robustness of our conclusions.

Considering that the variation in RDS is within 0.1 eV, we did not extend the solvation treatment to the remaining ten systems to ensure computational efficiency.
